# Supplementary material for: Solvent-controlled synthesis of multicolor photoluminescent carbon dots for bioimaging
Source: Royal Society of Chemistry journal article supplement (doi:10.1039/c9ra04241e), 2019-01-01
Supplement: c9ra04241e1.pdf [file c9ra04241e1.pdf]

# Solvent-controlled synthesis of multicolor photoluminescent carbon dots for bioimaging

*Yang Yan,<sup>a,b,†</sup> Longyu Xia<sup>a,b,†</sup> and Lan Ma<sup>b,\*</sup>*

a Department of Chemistry, Tsinghua University, Beijing 100084, P. R. China

b Division of Life Science and Health, Tsinghua University Graduate School at

Shenzhen, Shenzhen 518055, P. R. China.

**Table S1.** Summary of PL lifetimes of the four as-prepared CDs.

| Sample | $\lambda_{\text{ex}}/\text{nm}$ | $\lambda_{\text{em}}/\text{nm}$ | $\tau_1/\text{ns}$ | B [%] | $\tau_2/\text{ns}$ | B [%] | $\tau(\text{avg})$ | $\chi^2$ |
|--------|---------------------------------|---------------------------------|--------------------|-------|--------------------|-------|--------------------|----------|
| B-CDs  | 371                             | 445                             | 2.47               | 19.56 | 6.82               | 80.44 | 5.97               | 1.24     |
| G-CDs  | 420                             | 513                             | 5.04               | 21.20 | 12.58              | 78.80 | 10.98              | 1.24     |
| Y-CDs  | 420                             | 557                             | 2.65               | 32.58 | 5.02               | 67.42 | 4.25               | 1.63     |
| R-CDs  | 2                               | 620                             | 1.56               | 73.40 | 6.00               | 26.60 | 2.74               | 1.61     |

**Table S2.** PL QY data of the four as-prepared CDs under their optimal excitation wavelengths.

| Sample | Excitation(nm) | Emission(nm) | FWHM(nm) | Quantum Yield (%) |
|--------|----------------|--------------|----------|-------------------|
| B-CDs  | 371            | 445          | 86       | 27.3              |
| G-CDs  | 420            | 513          | 93       | 31.1              |
| Y-CDs  | 420            | 557          | 86       | 22.9              |
| R-CDs  | 522            | 620          | 83       | 8.8               |

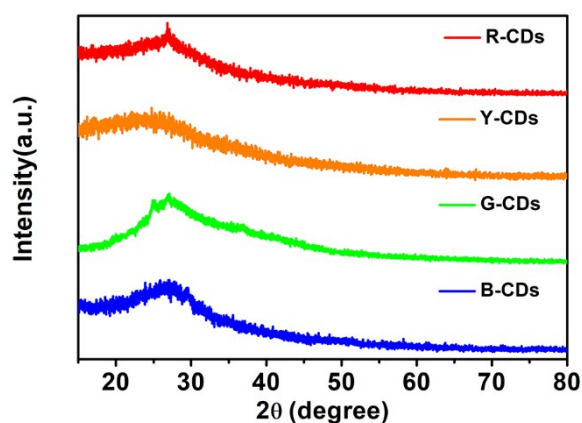**Figure S1.** The X-ray diffraction (XRD) patterns of the four as-prepared CDs.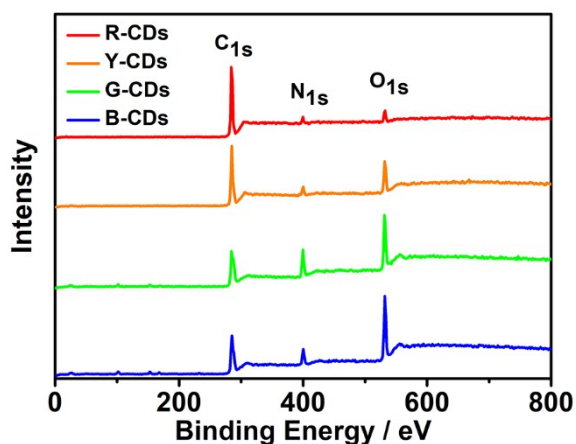**Figure S2.** The XPS full survey spectrum of four as-prepared CDs.

**Table S3.** Elemental analysis results of the four as-prepared CDs.

| Sample | C (%) | N (%) | O (%) |
|--------|-------|-------|-------|
| B-CDs  | 55.4  | 13.0  | 31.6  |
| G-CDs  | 56.7  | 16.5  | 26.7  |
| Y-CDs  | 76.2  | 7.2   | 16.6  |
| R-CDs  | 88.9  | 5.1   | 6.0   |

**Table S4.** XPS data analysis of the four as-prepared CDs.

| Sample | C (%)   |         |       | N (%)     |          | O (%) |       |
|--------|---------|---------|-------|-----------|----------|-------|-------|
|        | C-C/C=C | C=N/C=O | C-O   | Pyridinic | Pyrrolic | C=O   | C-O   |
| B-CDs  | 54.86   | 29.38   | 15.76 | 63.01     | 36.99    | 61.43 | 38.57 |
| G-CDs  | 47.28   | 43.51   | 9.21  | 65.71     | 34.29    | 79.12 | 20.88 |
| Y-CDs  | 70.89   | 16.84   | 12.27 | 68.69     | 31.31    | 85.65 | 14.35 |
| R-CDs  | 69.81   | 5.42    | 24.77 | 90.34     | 9.66     | 56.12 | 43.88 |

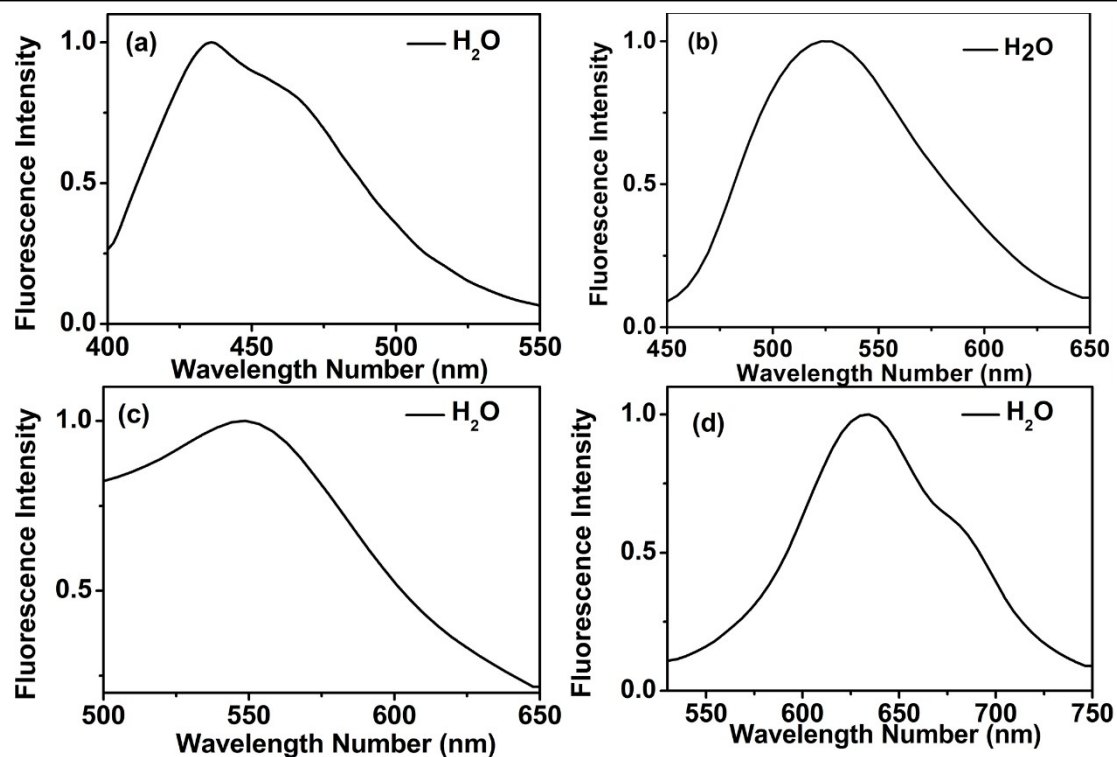**Figure S3.** The PL emission of the four as-prepared CDs dispersed in water. (a) B-CDs, (b) G-CDs, (c) Y-CDs, and (d) R-CDs.

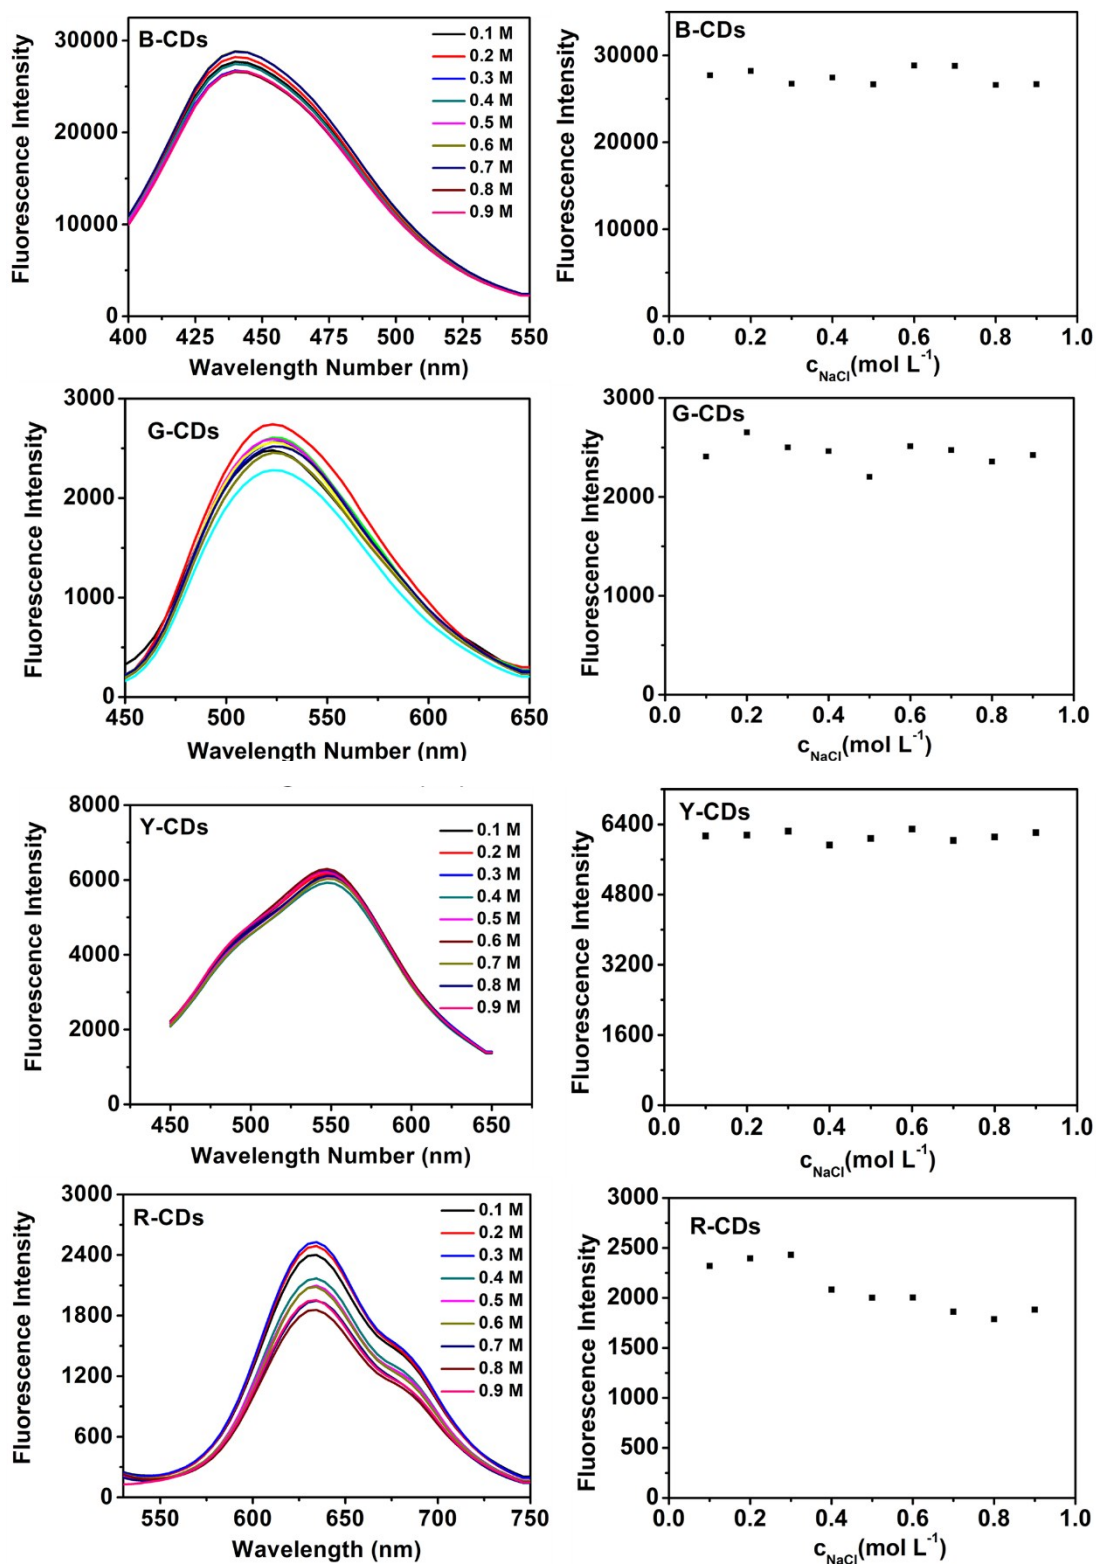

**Figure S4.** The impact of ion strength to the PL emission of the four as-prepared CDs.

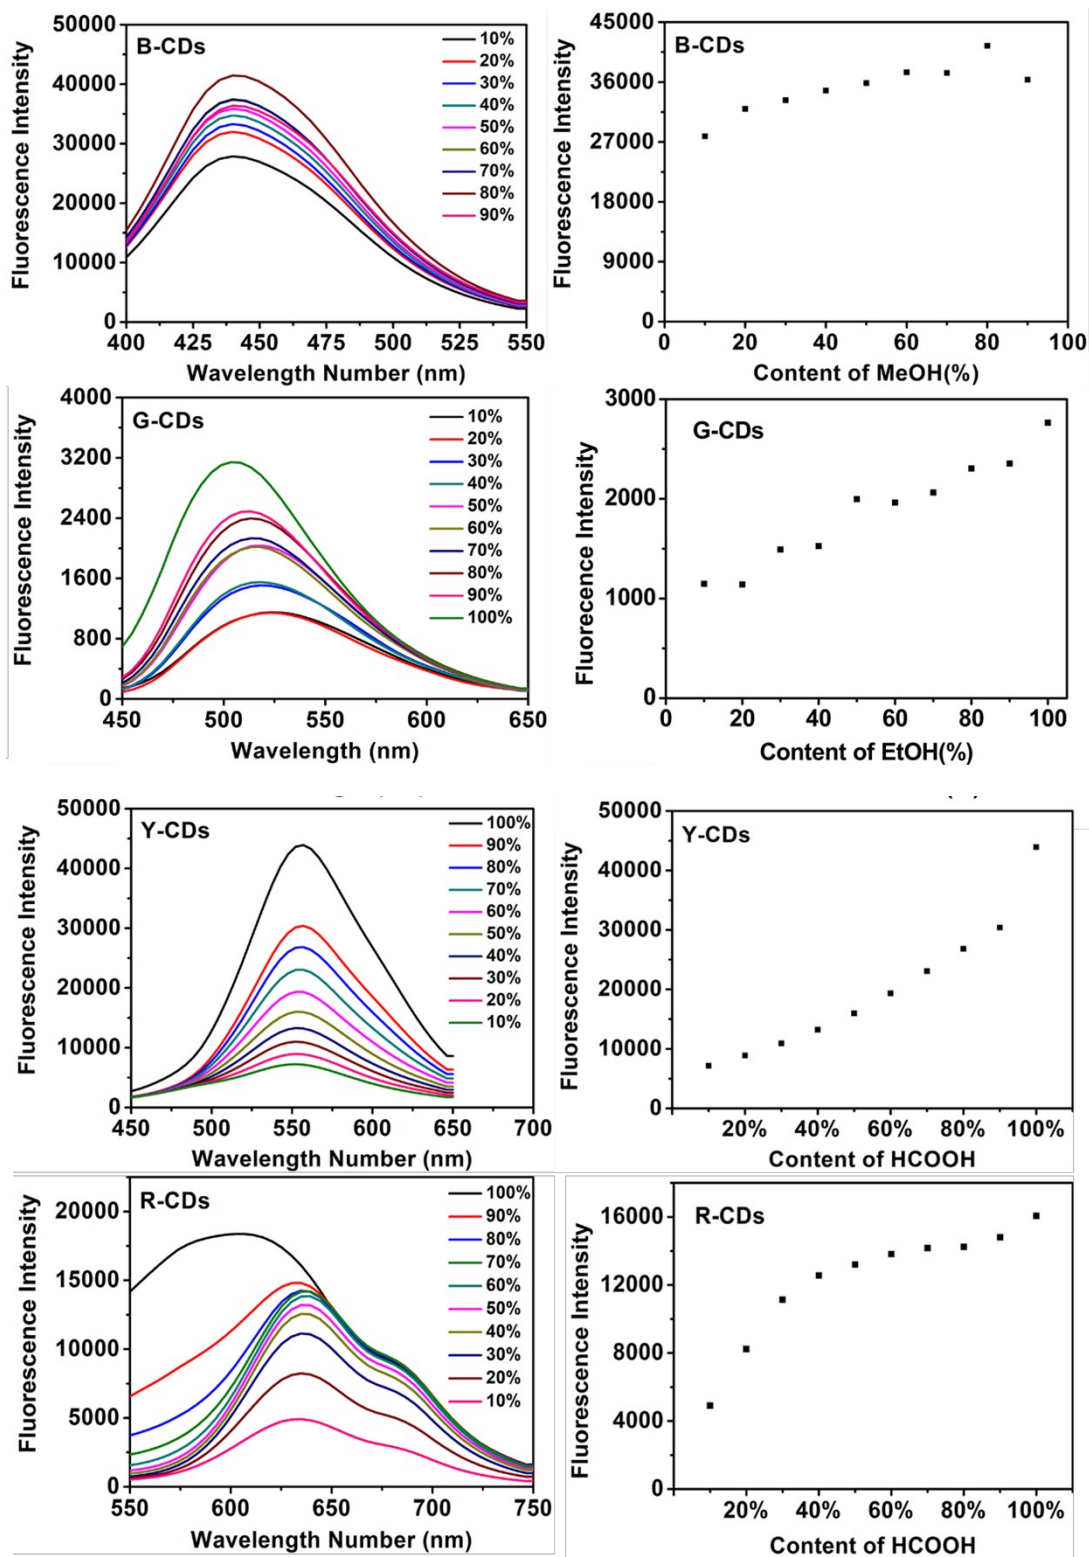

**Figure S5.** The impact of solvent content to the PL emission of the four as-prepared CDs.

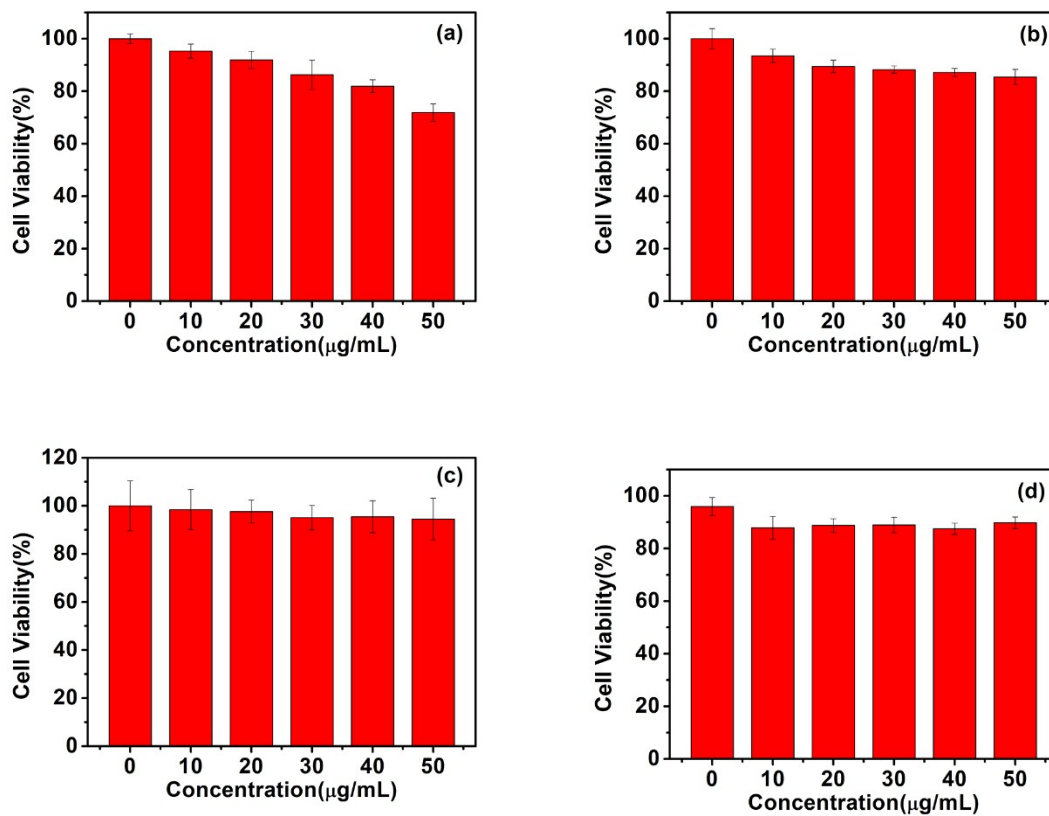

**Figure S6.** Viability of MDA-MB-231 cells after 24 h incubation with different concentration of all the four as-prepared CDs (a) B-CDs, (b) G-CDs, (c) Y-CDs, and (d) R-CDs.
